# Supplementary material for: A new phylogenetic hypothesis of Tanystropheidae (Diapsida, Archosauromorpha) and other “protorosaurs”, and its implications for the early evolution of stem archosaurs
Source: PeerJ. 2021 May 3;9:e11143. doi: 10.7717/peerj.11143 (PMC8101476; doi:10.7717/peerj.11143)
Supplement: Supplemental Information 2 [file peerj-09-11143-s002.xlsx]

## Sheet: Sheet1
	1	2	3	4	5	6	7	8	9	10	11	12	13	14	15	16	17	18	19	20	21	22	23	24	25	26	27	28	29	30	31	32	33	34	35	36	37	38	39	40	41	42	43	44	45	46	47	48	49
Petrolacosaurus kansensis (Reisz, 1981)	⁓0.45 (1)	0.41 (1)	?	0.18 (1)	0	0	2	0	0	n/a	1	0	5 (1)	1	0	0	0	0	0	0	0	0	0	0	1	29 (1)	0	n/a	0	1	0	n/a	0	0	0	0	0	0	0	0	?	0	0.76 (0)	?	0	?	0	?	1
Petrolacosaurus kansensis (Peabody, 1952)	-	-	?	-	-	-	-	-	-	-	-	-	-	-	-	-	-	-	-	-	-	-	-	-	-	-	-	-	-	-	-	-	-	-	-	-	-	-	-	-	?	-	-	?	-	?	-	?	-
Reference in literature source	KUVP 9952	KUVP 9952		KUVP 9952	KUVP 9952	KUVP 9952	KUVP 8351	KUVP 8351	KUVP 9952 and text	KUVP 9952 and text	text and reconstruction	KUVP 8351	Reconstruction	KUVP 8351 and reconstruction	KUVP 9952	KUVP 9952	KUVP 9952 and text	KUVP 9952 and text	KUVP 9952 and text	KUVP 9952	KUVP 9951	KUVP 9952	KUVP 9952	KUVP 9952	KUVP 9952	KUVP 9952	KUVP 9951 and text	KUVP 9951 and text	KUVP 9952	KUVP 9952 and reconstruction	KUVP 8351	KUVP 8351	KUVP 9952	KUVP 9952	KUVP 9952	KUVP 33607 and text		KUVP 9951	KUVP 9951	KUVP 9952 and text		KUVP 9951	KUVP 9951		KUVP 33606		KUVP 9952		KUVP 33606
Petrolacosaurus kansensis total	1	1	?	1	0	0	2	0	0	-	1	0	1	1	0	0	0	0	0	0	0	0	0	0	1	1	0	-	0	1	0	-	0	0	0	0	0	0	0	0	?	0	0	?	0	?	0	?	1
Orovenator mayorum (OMNH 74606 from Ford and Benson 2018)	0.48 (1)	0.45 (1)	0	0.15 (1)	0	1	2	0	0	n/a	1	0	5 (1)	0	0	0	0	0	1	0	0	0	0	0	3	30 (1)	0	n/a	0	1	0	n/a	0	0	0	1	0	0	0	?	?	0	3.41 (1)	-	-	-	0	0	-
Orovenator mayorum (OMNH 74607 from Ford and Benson 2018)	-	-	0	-	-	-	-	-	-	-	-	-	-	-	-	-	-	-	-	-	-	-	-	-	-	-	-	-	-	-	-	n/a	-	-	-	-	-	-	-	?	?	-	-	0	0	0	0	-	1
Orovenator mayorum total	1	1	0	1	0	1	2	0	0	-	1	0	1	0	0	0	0	0	1	0	0	0	0	0	3	1	0	-	0	1	0	-	0	0	0	1	0	0	0	?	?	0	1	0	0	0	0	0	1
Youngina capensis AMNH FARB 5561	0.39 (0)	0.42 (1)	0	-	-	-	-	-	-	-	-	-	-	-	-	-	-	?	1	0	0	0	-	0	2	-	0	n/a	-	-	0	-	-	?	-	-	0	0	0	0	0	0	1.03 (0)	0	0	0	0	0	-
Youngina capensis BP/1/2871	0.46 (1)	0.39 (1)	0	-	-	-	2	-	-	-	1	-	-	-	-	-	-	?	-	0	0	0	0	0	2	-	0	n/a	-	-	-	-	0	?	1	-	0	0	0	0	0	-	-	-	-	-	0	0	-
Youngina capensis BP/1/3859	-	-	-	-	-	-	-	-	-	-	-	-	-	-	-	-	-	?	-	-	-	-	-	-	-	-	-	-	-	-	-	-	-	?	-	0	-	-	-	-	-	0	2.64 (1)	0	0	0	-	-	3
Youngina capensis BP/1/375	-	-	-	-	-	-	-	-	-	-	-	-	-	-	-	-	-	?	-	-	-	-	-	-	-	-	-	-	-	-	-	-	-	?	-	-	-	-	-	-	-	-	-	-	-	-	-	-	-
Youngina capensis SAM-PK-K7578	-	-	-	0.23 (2)	0	1	2	0	1	1	-	0	-	0	0	0	0	?	1	-	0	-	-	-	-	-	-	-	0	1	0	n/a	-	?	-	-	-	-	-	-	-	-	-	-	-	-	-	-	-
Youngina capensis SAM-PK-K6205	-	-	-	-	-	-	-	-	-	-	-	-	-	-	-	-	-	?	-	-	-	-	-	-	2	-	-	-	-	-	-	-	-	?	-	-	-	-	-	-	-	-	-	-	-	-	-	-	-
Youngina capensis SAM-PK-8565	-	-	-	-	-	-	-	-	-	-	-	-	-	-	-	-	-	?	-	-	-	-	-	-	-	-	-	-	-	-	-	-	-	?	-	-	-	-	-	-	-	-	-	-	-	-	-	-	-
Youngina capensis (Smith and Evans 1996)	-	-	-	-	-	-	-	-	-	-	-	-	-	-	-	-	-	?	-	-	-	-	-	-	-	-	-	-	-	-	-	-	-	?	-	-	-	-	-	-	-	-	-	-	-	-	-	-	-
Youngina capensis (Gow 1975)	-	-	-	-	-	-	-	-	-	-	-	-	3 or 4 (2 or 3)	-	-	-	-	?	-	-	-	-	-	-	-	⁓30 (1)	-	-	-	-	-	-	-	?	-	-	-	-	-	-	-	-	-	-	-	-	-	-	-
Youngina capensis (Gardner et al. 2010)	-	-	-	-	-	-	-	-	-	-	-	-	-	-	-	-	-	?	-	-	-	-	-	-	-	-	-	-	-	-	-	-	-	?	-	-	-	-	-	-	-	-	-	-	-	-	-	-	-
Youngina capensis (Evans 1987)	-	-	-	-	-	-	-	-	-	-	-	-	-	-	-	-	-	?	-	-	-	-	-	-	-	-	-	-	-	-	-	-	-	?	-	-	-	-	-	-	-	-	-	-	-	-	-	-	-
Reference in literature source													text													text
Youngina capensis total	0&1	1	0	2	0	1	2	0	1	1	1	0	2/3	0	0	0	0	?	1	0	0	0	0	0	2	1	0	-	0	1	0	-	0	?	1	0	0	0	0	0	0	0	0&1	0	0	0	0	0	3
Acerosodontosaurus piveteaui (MNHN 1908-32-57 from Bickelmann et al. 2009)	?	?	?	?	?	?	?	?	?	?	?	?	?	?	?	?	?	?	?	0	0	0	0	0	0	>28 (1)	0	n/a	?	?	?	?	?	?	1 or 2	0	0	0	0	?	0	0	1.74 (0)	?	0	?	0	?	?
Acerodontosaurus piveteaui (MNHN 1908-32-57 from Currie 1980)	?	?	?	?	?	?	?	?	?	?	?	?	?	?	?	?	?	?	?	-	-	-	-	-	-	-	-	-	?	?	?	?	?	?	-	-	-	-	-	?	-	-	-	?	-	?	-	?	?
Reference in literature source																				Fig. 2	Fig. 2	Fig. 2	Fig. 2	Fig. 2	Fig. 2	Fig. 2	Fig. 2	Fig. 2							Fig. 2	Fig. 2	Fig. 2	Fig. 2	Fig. 2		Fig. 2	Fig. 2	Fig. 2		Fig. 2		Fig. 2
Acerosodontosaurus piveteaui total	?	?	?	?	?	?	?	?	?	?	?	?	?	?	?	?	?	?	?	0	0	0	0	0	0	1	0	-	?	?	?	?	?	?	1/2	0	0	0	0	?	0	0	0	?	0	?	0	?	?
Claudiosaurus germaini (Carroll 1981)	between 0.39 and 0.46 (0 or 1)	?	?	⁓0.37 (2)	?	?	2	0	?	?	?	0	⁓14 (0)	?	?	?	?	?	?	0	2	0	0	0	0	⁓23 (1)	0	n/a	?	?	0	?	?	?	1	?	0	0	0	?	?	1	n/a	1	0	?	0	?	?
Reference in literature source	P.M. 1978- 6-1			Reconstruction			text	C.G. 20/10				text	text							C.G. 20/ 6	C.G. 20/ 6	C.G. 20/ 6	C.G. 20/ 6	C.G. 20/ 6	C.G. 20/ 6	Reconstruction	C.G. 20/ 6	C.G. 20/ 6			C.G. 20/10				C.G. 20/ 6		C.G. 20/ 6	C.G. 20/ 6	C.G. 20/ 6			C.G. 20/ 6	C.G. 20/ 6	text	C.G. 20/ 6		C.G. 20/ 6 and text
Claudiosaurus germaini total	0/1	?	?	2	?	?	2	0	?	?	?	0	0	?	?	?	?	?	?	0	2	0	0	0	0	1	0	-	?	?	0	?	?	?	1	?	0	0	0	?	?	1	-	1	0	?	0	?	?
Gephyrosaurus bridensis (Evans 1980)	0.35 (0)	0.32 (1)	0	0.10 (0)	0	0	2	0	0	n/a	1	0	8 to 10 (0)	1	0	0	0	0	1	?	0	0	0	0	0	35 to 40 (1)	0	n/a	0	1	0	n/a	0	0	2	0	1	0	0	1	n/a	0	1.99 (0)	1	0	0	0	0	1
Gephyrosaurus bridensis (Evans 1981)	-	-	-	-	-	-	-	-	-	-	-	-	-	-	-	-	-	-	-	?	-	-	-	-	-	-	-	-	-	-	-	-	-	-	-	-	-	-	-	-	-	-	-	-	-	-	-	-	-
Reference in literature source	skull reconstruction	skull reconstruction	skull reconstruction	skull reconstruction	skull reconstruction	Fig. 29	Fig. 29	Fig. 29	Fig. 29	Fig. 29	skull reconstruction and Fig. 30b	Fig. 29	text	Fig. 29 and 30	skull reconstruction and Fig. 31	skull reconstruction and Fig. 31	Fig. 29	text	Fig. 31a		Fig. 31	skull reconstruction	Fig. 31a	Fig. 31	skull reconstruction and Fig. 31	text	skull reconstruction and Fig. 14	skull reconstruction and Fig. 14	skull reconstruction and Fig. 29	skull reconstruction	skull reconstruction and Fig. 30	skull reconstruction and Fig. 30	Fig. 4a	Fig. 4	Fig. 10d, skull reconstruction, and text	Fig. 11	skull reconstruction	Fig. 15 and 31	Fig. 15	Fig. 15 and text	Fig. 15 and text	Fig. 14	Fig. 14	text and various figures	skull reconstruction and Fig. 10	Fig. 10	skull reconstruction	various figures	skull reconstruction and Fig. 7b
Gephyrosaurus bridensis total	0	1	0	0	0	0	2	0	0	-	1	0	0	1	0	0	0	0	1	?	0	0	0	0	0	1	0	-	0	1	0	-	0	0	2	0	1	0	0	1	-	0	0	1	0	0	0	0	1
Planocephalosaurus robinsonae (Fraser 1982)	0.35 (0)	0.58 (2)	0	0.18 (1)	0	-	-	-	-	-	0	-	4 (2)	0	0	0	0	?	-	-	-	0	-	0	2	12 to 14, occasionally up to 17 (0)	0	n/a	0	0	0	n/a	0	0	?	?	1	0	0	0	n/a	0	3.30 (1)	0	0	0	0	0	0
Planocephalosaurus robinsonae (Ezcurra 2016)	-	-	-	-	-	1	2	0	0	n/a	-	0	-	-	-	-	0	?	1	0	0	-	0	-	-	-	-	-	-	-	-	-	-	-	?	?	-	-	-	-	-	-	-	-	-	-	-	-	-
Planocephalosaurus robinsonae (Fraser and Walkden 1984)	-	-	-	-	-	-	-	-	-	-	-	-	-	-	-	-	-	?	-	-	-	-	-	-	-	-	-	-	-	-	-	-	-	-	?	?	-	-	-	-	-	-	-	-	-	-	-	-	-
Reference in literature source	skull reconstruction	skull reconstruction	skull reconstruction	skull reconstruction	skull reconstruction	Fig. 21A, NHMUK PV R9955	Fig. 21A, NHMUK PV R9955	Fig. 21A, NHMUK PV R9955	Fig. 21A, NHMUK PV R9955	Fig. 21A, NHMUK PV R9955	skull reconstruction	Fig. 21A, NHMUK PV R9955	AUP No. 11065, plate 70, fig. 1, and text	AUP No. 11065, plate 70, fig. 1	skull reconstruction and text	skull reconstruction and text	Fig. 21A, NHMUK PV R9955		Fig. 22A, NHMUK PV R9954	Fig. 22A, NHMUK PV R9954	Fig. 22A, NHMUK PV R9954	skull reconstruction	Fig. 22A, NHMUK PV R9954	skull reconstruction	skull reconstruction	text	skull reconstruction	skull reconstruction	skull reconstruction and text	skull reconstruction	skull reconstruction	skull reconstruction	skull reconstruction	skull reconstruction and text			skull reconstruction	text and text-fig. 2	text-fig. 1 and 2	skull reconstruction	skull reconstruction	skull reconstruction	skull reconstruction	skull reconstruction and text	skull reconstruction, AUP No. 11064 from plate 69, fig. 7	AUP No. 11064 from plate 69, fig. 7	skull reconstruction, AUP No. 11064 from plate 69, fig. 7	skull reconstruction and text	skull reconstruction and text
Planocephalosaurus robinsonae total	0	2	0	1	0	1	2	0	0	-	0	0	2	0	0	0	0	?	1	0	0	0	0	0	2	0	0	-	0	0	0	-	0	0	?	?	1	0	0	0	-	0	1	0	0	0	?	0	0
Czatkowiella harae (Borsuk-Białynicka and Evans 2009)	?	?	?	?	?	0	2	0	0	n/a	0	0	3 to 5 (1,2, or 3)	0	?	?	0	?	1	?	?	0	0	0	1	>20 (1)	0	n/a	0	?	0	n/a	?	?	1 or 2	0	?	0	0	0	?	0	0.62 (0)	1	0	0	?	0	1
Reference in literature source						ZPAL RV/5	ZPAL RV/5/text	ZPAL RV/5	ZPAL RV/5		ZPAL RV/111	ZPAL RV/5	ZPAL RV/5 and ZPAL RV/111	ZPAL RV/5			ZPAL RV/5/text		ZPAL RV/100		ZPAL RV/100	ZPAL RV/100 and ZPAL RV/225	ZPAL RV/100	ZPAL RV/471	ZPAL RV/100	ZPAL RV/100	ZPAL RV/100 and ZPAL RV/113		ZPAL RV/111		ZPAL RV/995				ZPAL RV/224 and ZPAL RV/225	ZPAL RV/225		ZPAL RV/100 and ZPAL RV/113	ZPAL RV/113	ZPAL RV/113		ZPAL RV/113	ZPAL RV/113	ZPAL RV/342 and ZPAL RV/724	ZPAL RV/466	ZPAL RV/466		ZPAL RV/113	ZPAL RV/995
Czatkowiella harae total	?	?	?	?	?	0	2	0	0	-	0	0	1/2/3	0	?	?	0	?	1	?	?	0	0	0	1	1	0	-	0	?	0	-	?	?	1/2	0	?	0	0	0	?	0	0	1	0	0	?	0	1
Protorosaurus speneri NMK S 180	0.55 (1)	0.35 (1)	?	0.09 (0)	0	1	2	0	0	n/a	?	0	-	0	0	0	?	?	1	0	0	0	0	0	1	-	0	n/a	0	1	0	?	0	0	1	0	0	0	0	1	0	0	?	0	0	0	0	0	?
Protorosaurus speneri WMsN P 47361	-	-	?	-	-	-	-	-	-	-	?	-	-	-	-	-	?	?	-	-	-	-	-	-	-	-	-	-	-	-	-	?	-	-	-	-	-	-	-	-	-	-	?	0	-	-	-	-	?
Protorosaurus speneri (Gottmann and Sander 2009)	-	-	?	-	-	-	-	-	-	-	?	-	3 (3)	-	-	-	?	?	-	-	-	-	-	-	-	⁓28 (1)	-	-	-	-	-	?	-	-	-	-	-	-	-	-	-	-	?	-	-	-	-	-	?
Protorosaurus speneri (Evans and King 1993)	-	-	?	-	-	-	-	-	-	-	?	-	-	-	-	-	?	?	-	-	-	-	-	-	-	-	-	-	-	-	-	?	-	-	-	-	-	-	-	-	-	-	?	-	-	-	-	-	?
Reference in literature source													text													text
Protorosaurus speneri total	1	1	?	0	0	1	2	0	0	-	?	0	3	0	0	0	?	?	1	0	0	0	0	0	1	1	0	-	0	1	0	?	0	0	1	0	0	0	0	1	0	0	?	0	0	0	0	0	?
Jesairosaurus lehmani ZAR 06	0.46 (1)	?	0	0.33 (2)	0	?	?	?	?	?	1	?	between 9 and 12 (0)	0	?	1	?	?	1	1	?	0	?	0	1	⁓19 (1)	0	n/a	?	?	?	?	?	?	1 ro 2	-	?	0	0	?	n/a	0	?	0	-	?	0	0	?
Jesairosaurus lehmani ZAR 07	-	?	-	-	-	?	?	?	?	?	-	?	-	-	?	-	?	?	-	-	?	-	?	-	-	-	-	-	?	?	?	?	?	?	-	0	?	-	-	?	n/a	0	?	0	0	?	-	-	?
Jesairosaurus lehmani ZAR 08	-	?	-	-	-	?	?	?	?	?	-	?	-	-	?	-	?	?	-	-	?	-	?	-	-	-	-	-	?	?	?	?	?	?	-	-	?	-	-	?	n/a	-	?	-	0	?	-	-	?
Jesairosaurus lehmani ZAR 09	-	?	-	-	-	?	?	?	?	?	-	?	-	-	?	-	?	?	-	-	?	-	?	-	-	-	-	-	?	?	?	?	?	?	-	-	?	-	-	?	-	-	?	-	-	?	-	-	?
Jesairosaurus lehmani ZAR 10	-	?	-	-	-	?	?	?	?	?	-	?	-	-	?	-	?	?	-	-	?	-	?	-	-	-	-	-	?	?	?	?	?	?	-	-	?	-	-	?	-	-	?	-	-	?	-	-	?
Jesairosaurus lehmani ZAR 11	-	?	-	-	-	?	?	?	?	?	-	?	-	-	?	-	?	?	-	-	?	-	?	-	-	-	-	-	?	?	?	?	?	?	-	-	?	-	-	?	-	-	?	-	-	?	-	-	?
Jesairosaurus lehmani ZAR 12	-	?	-	-	-	?	?	?	?	?	-	?	-	-	?	-	?	?	-	-	?	-	?	-	-	-	-	-	?	?	?	?	?	?	-	-	?	-	-	?	-	-	?	-	-	?	-	-	?
Jesairosaurus lehmani ZAR 13	-	?	-	-	-	?	?	?	?	?	-	?	-	-	?	-	?	?	-	-	?	-	?	-	-	-	-	-	?	?	?	?	?	?	-	-	?	-	-	?	-	-	?	-	-	?	-	-	?
Jesairosaurus lehmani ZAR 14	-	?	-	-	-	?	?	?	?	?	-	?	-	-	?	-	?	?	-	-	?	-	?	-	-	-	-	-	?	?	?	?	?	?	-	-	?	-	-	?	-	-	?	-	-	?	-	-	?
Jesairosaurus lehmani ZAR 15	-	?	-	-	-	?	?	?	?	?	-	?	-	-	?	-	?	?	-	-	?	-	?	-	-	-	-	-	?	?	?	?	?	?	-	-	?	-	-	?	-	-	?	-	-	?	-	-	?
Jesairosaurus lehmani total	1	?	0	2	0	?	?	?	?	?	1	?	0	0	?	1	?	?	1	1	?	0	?	0	1	1	0	-	?	?	?	?	?	?	1/2	0	?	0	0	?	-	0	?	0	0	?	0	0	?
Macrocnemus bassanii PIMUZ T 2472	-	-	-	-	0	0	-	-	-	-		0	-	0	-	-	-	?	-	-	-	-	-	-	-	-	-	-	-	-	-	-	-	-	-	-	-	-	-	-	-	?	?	-	0	-	0	-	?
Macrocnemus bassanii PIMUZ T 4822	0.55 (1)	0.27 (0)	-	0.25 (2)	-	-	0	n/a	2	1	-	-	-	0	1	n/a	-	?	-	1	1	0	0	0	1	>23 (1)	0	n/a	0	1	1	-	-	-	2	-	0	0	0	0	0	?	?	0	0	0	-	0	?
Macrocnemus bassanii PIMUZ T 2477 (extrapolated from data of Miedema et al. 2020)	0.53 (1)	0.23 (0)	0	0.35 (2)	0	0	0	n/a	2	1	0	0	11 (0)	0	1	n/a	3	?	1	-	1	0	0	0	1	>25 (1)	0	n/a	-	-	1	n/a	0	0	-	-	0	0	0	0	0	?	?	0	0	-	0	0	?
Macrocnemus bassanii BES SC 111	-	-	-	-	-	-	-	-	-	-	-	-	-	-	-	-	-	?	-	-	-	-	-	-	-	-	-	-	-	-	-	-	-	-	-	0	-	-	-	-	-	?	?	-	-	-	-	-	?
Macrocnemus bassanii PIMUZ T 4355	-	-	-	-	-	-	-	-	-	-	-	-	-	-	-	-	-	?	-	-	-	-	-	-	-	-	-	-	-	-	-	-	-	-	-	-	-	-	-	-	-	?	?	-	-	-	-	-	?
Macrocnemus bassanii MSNM V 457	-	-	-	-	-	-	-	-	-	-	-	-	-	-	-	-	-	?	-	-	-	-	-	-	-	-	-	-	-	-	-	-	-	-	-	-	-	-	-	-	-	?	?	-	-	-	-	-	?
Macrocnemus bassanii PIMUZ T 2476 (including X-ray data from Peyer 1937, Besano II specimen therein)	-	-	-	-	-	-	-	-	-	-	-	-	-	-	-	-	-	?	-	-	-	-	-	-	-	-	-	-	-	-	-	-	-	-	-	-	-	-	-	-	-	?	?	-	-	-	-	-	?
Macrocnemus bassanii total	1	0	0	2	0	0	0	-	2	1	0	0	0	0	1	-	3	?	1	1	1	0	0	0	1	1	0	-	0	1	1	-	0	0	2	0	0	0	0	0	0	?	?	0	0	0	0	0	?
Macrocnemus obristi PIMUZ A/III 1467	?	?	?	?	?	?	?	?	?	?	?	?	?	?	?	?	?	?	?	?	?	?	?	?	?	?	?	?	?	?	?	?	?	?	?	?	?	?	?	?	?	?	?	?	?	?	?	?	?
Macrocnemus obristi PIMUZ A/III 722	?	?	?	?	?	?	?	?	?	?	?	?	?	?	?	?	?	?	?	?	?	?	?	?	?	?	?	?	?	?	?	?	?	?	?	?	?	?	?	?	?	?	?	?	?	?	?	?	?
Macrocnemus obristi total	?	?	?	?	?	?	?	?	?	?	?	?	?	?	?	?	?	?	?	?	?	?	?	?	?	?	?	?	?	?	?	?	?	?	?	?	?	?	?	?	?	?	?	?	?	?	?	?	?
Macrocnemus fuyuanensis IVPP V15001		-	?	-	-	-	-	-	-	-	-	?	-	0	-	-	?	?	?	-	-	-	-	-	-	-	-	-	-	-	-	-	-	-	?	?	-	-	0	-	-	-	-	?	-	?	-	?	?
Macrocnemus fuyuanensis GMPKU-P-3001	0.53 (1)	⁓0.25 (0)	?	0.24 (2)	0	0	0	n/a	2	1	0	?	>8 (0)	0	1	n/a	?	?	?	-	-	0	0	0	1	⁓30 (1)	0	n/a	0	1	1	n/a	0	0	?	?	0	0	0	-	0	-	-	?	0	?	0	?	?
Macrocnemus fuyuanensis PIMUZ T 1559	-	-	?	0.28 (2)	0	0	0	n/a	2	1	0	0	-	0	1	n/a	?	?	?	1	1	0	0	0	1	-	0	n/a	0	1	-	n/a	0	0	?	?	0	-	0	0	-	0	1.67 (0)	?	-	?	-	?	?
Macrocnemus fuyuanensis total	1	0	?	2	0	0	0	-	2	1	0	?	0	0	1	-	?	?	?	1	1	0	0	0	1	1	0	-	0	1	1	-	0	0	?	?	0	0	0	0	0	0	0	?	0	?	0	?	?
Tanystropheus hydroides PIMUZ T 2817	-	-	-	-	-	-	-	-	-	-	-	-	-	-	-	-	-	?	-	-	-	-	-	-	-	-	-	-	-	-	-	-	-	-	?	-	-	-	-	-	-	-	-	-	-	-	-	-	-
Tanystropheus hydroides PIMUZ T 2819	0.62 (1)	-	-	-	-	0	-	-	-	-	-	0	-	0	0	0	-	?	0	-	-	-	0	0	-	-	0	n/a	-	-	-	-	1	-	?	-	0	0	0	0	-	0	3.53 (1)	0	0	0	-	1	-
Tanystropheus hydroides PIMUZ T 2787	-	-	-	-	-	-	n/a	-	-	-	-	-	-	0	-	-	-	?	-	-	-	-	-	-	-	-	-	-	1	n/a	1	1	-	0	?	-	-	-	-	-	-	-	-	0	-	-	-	-	3
Tanystropheus hydroides PIMUZ T 2790 (extrapolated from data of Spiekman et al. 2020)	0.57 (1)	0.56 (2)	0	0.45 (3)	0	0	n/a	n/a	0	n/a	0	0	6 (1)	0	0	0	0	?	0	1	2	0	0	0	0	15 (0)	0	n/a	1	n/a	1	-	1	0	?	1	0	0	0	0	n/a	0	2.11 (0)	0	-	0	0	-	3
Tanystropheus hydroides PIMUZ T 2793	-	-	-	-	-	-	-	-	-	-	-	-	-	-	-	-	-	?	-	-	-	-	-	-	-	-	-	-	-	-	-	-	-	-	?	-	-	-	-	-	-	-	-	-	-	-	-	-	-
Tanystropheus hydroides PIMUZ T 2818	-	-	-	-	-	-	-	-	-	-	-	-	-	-	-	-	-	?	-	-	-	-	-	-	-	-	-	-	-	-	-	-	-	-	?	-	-	-	-	-	-	-	-	-	-	-	-	-	-
Tanystropheus hydroides PIMUZ T 2483	-	-	-	-	-	-	-	-	-	-	-	-	-	-	-	-	-	?	-	-	-	-	-	-	-	-	-	-	-	-	-	-	-	-	?	-	-	-	-	-	-	-	-	-	-	-	-	-	-
Tanystropheus hydroides total	1	2	0	3	0	0	-	-	0	-	0	0	1	0	0	0	0	?	0	1	2	0	0	0	0	0	0	-	1	-	1	1	1	0	?	1	0	0	0	0	-	0	0&1	0	0	0	0	1	3
Tanystropheuscf. hydroides GMPKU-P-1527	?	?	?	?	?	?	?	?	?	?	?	?	?	?	?	?	?	?	?	?	?	?	?	?	?	?	?	?	?	?	?	?	?	?	?	?	?	?	?	?	?	?	?	?	?	?	?	?	?
Tanystropheuscf. hydroides total	?	?	?	?	?	?	?	?	?	?	?	?	?	?	?	?	?	?	?	?	?	?	?	?	?	?	?	?	?	?	?	?	?	?	?	?	?	?	?	?	?	?	?	?	?	?	?	?	?
Tanystropheus longobardicus PIMUZ T 1277	?	-	?	-	-	?	-	-	-	-	?	?	-	?	-	?	?	?	-	-	-	-	-	?	-	-	?	?	-	-	-	-	-	-	-	-	-	-	-	-	?	-	-	-	?	-	-	-	-
Tanystropheus longobardicus PIMUZ T 2484	?	-	?	-	-	?	0	n/a	-	-	?	?	-	?	-	?	?	?	-	-	2	-	0	?	-	-	?	?	1	1	1	1	0	0	-	-	-	-	-	-	?	0	2.28 (0)	0	?	-	-	-	4
Tanystropheus longobardicus PIMUZ T 2791	?	-	?	-	0	?	-	-	-	-	?	?	-	?	-	?	?	?	-	1	-	0	-	?	-	-	?	?	-	-	-	-	-	-	-	-	-	-	-	-	?	-	-	-	?	-	-	-	-
Tanystropheus longobardicus PIMUZ T 3901	?	0.36 (1)	?	0.33 (2)	-	?	-	-	2	1	?	?	6 (1)	?	0	?	?	?	-	1	2	0	0	?	1	-	?	?	1	1	1	-	-	-	-	-	-	0	0	-	?	0	2.80 (1)	-	?	0	0	-	-
Tanystropheus longobardicus PIMUZ T 2482	?	-	?	-	-	?	-	-	-	-	?	?	-	?	-	?	?	?	-	-	-	-	-	?	-	-	?	?	-	-	-	-	-	-	-	-	-	-	-	-	?	-	-	-	?	-	-	-	-
Tanystropheus longobardicus MSNM BES SC 1018	?	-	?	0.35 (2)	-	?	0	n/a	2	1	?	?	-	?	0	?	?	?	0	1	-	0	0	?	1	14 (0)	?	?	-	-	1	-	-	-	2	0	0	0	0	0	?	-	-	-	?	0	0	1	-
Tanystropheus longobardicus MSNM BES SC 265	?	-	?	-	-	?	-	-	-	-	?	?	-	?	-	?	?	?	-	-	-	-	-	?	-	-	?	?	-	-	-	-	-	-	-	-	-	-	-	-	?	-	-	-	?	-	-	-	-
Tanystropheus longobardicus PIMUZ T 2795	?	-	?	-	-	?	-	-	-	-	?	?	-	?	-	?	?	?	-	-	-	-	-	?	-	-	?	?	-	-	-	-	-	-	-	-	-	-	-	-	?	-	-	-	?	-	-	-	-
Tanystropheus longobardicus MCSN 4451	?	-	?	-	-	?	-	-	-	-	?	?	-	?	-	?	?	?	-	-	-	-	-	?	-	-	?	?	-	-	-	-	-	-	-	-	-	-	-	-	?	-	-	-	?	-	-	-	-
Tanystropheus longobardicus total	?	1	?	2	0	?	0	-	2	1	?	?	1	?	0	?	?	?	0	1	2	0	0	?	1	0	?	?	1	1	1	1	0	0	2	0	0	0	0	0	?	0	0&1	0	?	0	0	1	4
Tanystropheus "conspicuus" U-MO BT 740	?	?	?	?	?	?	?	?	?	?	?	?	?	?	?	?	?	?	?	?	?	?	?	?	?	?	?	?	?	?	?	?	?	?	?	?	?	?	?	?	?	?	?	?	?	?	?	?	?
Tanystropheus "conspicuus" U-MO BT 736	?	?	?	?	?	?	?	?	?	?	?	?	?	?	?	?	?	?	?	?	?	?	?	?	?	?	?	?	?	?	?	?	?	?	?	?	?	?	?	?	?	?	?	?	?	?	?	?	?
Tanystropheus "conspicuus" U-MO BT 733	?	?	?	?	?	?	?	?	?	?	?	?	?	?	?	?	?	?	?	?	?	?	?	?	?	?	?	?	?	?	?	?	?	?	?	?	?	?	?	?	?	?	?	?	?	?	?	?	?
Tanystropheus "conspicuus" U-MO BT 732	?	?	?	?	?	?	?	?	?	?	?	?	?	?	?	?	?	?	?	?	?	?	?	?	?	?	?	?	?	?	?	?	?	?	?	?	?	?	?	?	?	?	?	?	?	?	?	?	?
Tanystropheus "conspicuus" total	?	?	?	?	?	?	?	?	?	?	?	?	?	?	?	?	?	?	?	?	?	?	?	?	?	?	?	?	?	?	?	?	?	?	?	?	?	?	?	?	?	?	?	?	?	?	?	?	?
"Tanystropheus antiquus" SMNS 16687	?	?	?	?	?	?	?	?	?	?	?	?	?	?	?	?	?	?	?	?	?	?	?	?	?	?	?	?	?	?	?	?	?	?	?	?	?	?	?	?	?	?	?	?	?	?	?	?	?
"Tanystropheus antiquus" Coll. Oosterink A638	?	?	?	?	?	?	?	?	?	?	?	?	?	?	?	?	?	?	?	?	?	?	?	?	?	?	?	?	?	?	?	?	?	?	?	?	?	?	?	?	?	?	?	?	?	?	?	?	?
"Tanystropheus antiquus" total	?	?	?	?	?	?	?	?	?	?	?	?	?	?	?	?	?	?	?	?	?	?	?	?	?	?	?	?	?	?	?	?	?	?	?	?	?	?	?	?	?	?	?	?	?	?	?	?	?
Sclerostropheus fossai (MCSNB 4035)	?	?	?	?	?	?	?	?	?	?	?	?	?	?	?	?	?	?	?	?	?	?	?	?	?	?	?	?	?	?	?	?	?	?	?	?	?	?	?	?	?	?	?	?	?	?	?	?	?
Sclerostropheus fossai total	?	?	?	?	?	?	?	?	?	?	?	?	?	?	?	?	?	?	?	?	?	?	?	?	?	?	?	?	?	?	?	?	?	?	?	?	?	?	?	?	?	?	?	?	?	?	?	?	?
Raibliania calligarisi (MFSN 27532)	?	?	?	?	?	?	?	?	?	?	?	?	?	?	?	?	?	?	?	?	?	?	?	?	?	?	?	?	?	?	?	?	?	?	?	?	?	?	?	?	?	?	?	?	?	?	?	?	?
Raibliania calligarisi total	?	?	?	?	?	?	?	?	?	?	?	?	?	?	?	?	?	?	?	?	?	?	?	?	?	?	?	?	?	?	?	?	?	?	?	?	?	?	?	?	?	?	?	?	?	?	?	?	?
Augustaburiania vatagini (Sennikov 2011)	?	?	?	?	?	?	?	?	?	?	?	?	?	?	?	?	?	?	?	?	?	?	?	?	?	?	?	?	?	?	?	?	?	?	?	?	?	?	?	?	?	?	?	?	?	?	?	?	?
Reference in literature source
Augustaburiania vatagini total	?	?	?	?	?	?	?	?	?	?	?	?	?	?	?	?	?	?	?	?	?	?	?	?	?	?	?	?	?	?	?	?	?	?	?	?	?	?	?	?	?	?	?	?	?	?	?	?	?
Langobardisaurus pandolfii MCSNB 2883	-	-	?	-	-	-	?	?	-	-	?	-	-	-	?	?	?	?	?	?	-	?	-	-	-	?	-	-	?	?	?	?	?	?	?	?	-	?	-	-	-	?	?	-	-	-	-	-	?
Langobardisaurus pandolfii MFSN 1921 (previously L. tonelloi)	0.51 (1)	⁓0.20 (0)	?	⁓0.18 (1)	0	0	?	?	2	1	?	1	5 (edentulous)	0	?	?	?	?	?	?	1	?	0	0	1	?	1	0	?	?	?	?	?	?	?	?	0	?	0	0	0	?	?	0	0	0	0	1	?
Langobardisaurus pandolfii MFSN 26829	-	-	?	-	-	-	?	?	-	-	?	-	-	-	?	?	?	?	?	?	-	?	-	-	-	?	-	-	?	?	?	?	?	?	?	?	-	?	-	-	-	?	?	-	-	-	-	-	?
Langobardisaurus pandolfii MCSNB 4860	-	-	?	-	-	-	?	?	-	-	?	-	-	-	?	?	?	?	?	?	-	?	-	-	-	?	-	-	?	?	?	?	?	?	?	?	-	?	-	-	-	?	?	-	-	-	-	-	?
Langobardisaurus pandolfii total	1	0	?	1	0	0	?	?	2	1	?	1	5	0	?	?	?	?	?	?	1	?	0	0	1	?	1	0	?	?	?	?	?	?	?	?	0	?	0	0	0	?	?	0	0	0	0	1	?
Amotosaurus rotfeldensisSMNS 50830	-	?	-	-	-	?	?	?	?	?	?	?	-	-	?	?	?	?	?	1	2	0	?	0	1	-	-	-	?	?	?	?	?	?	?	?	-	-	-	?	?	-	n/a	?	?	?	?	?	?
Amotosaurus rotfeldensisSMNS 54783a/b	-	?	-	-	-	?	?	?	?	?	?	?	-	-	?	?	?	?	?	-	-	-	?	-	-	-	-	-	?	?	?	?	?	?	?	?	-	-	-	?	?	-	n/a	?	?	?	?	?	?
Amotosaurus rotfeldensisSMNS 54810	-	?	-	-	-	?	?	?	?	?	?	?	-	-	?	?	?	?	?	-	-	-	?	-	-	-	-	-	?	?	?	?	?	?	?	?	-	-	-	?	?	-	n/a	?	?	?	?	?	?
Amotosaurus rotfeldensisSMNS 54784a	-	?	-	-	-	?	?	?	?	?	?	?	-	-	?	?	?	?	?	-	-	-	?	-	-	-	-	-	?	?	?	?	?	?	?	?	-	-	-	?	?	-	n/a	?	?	?	?	?	?
Amotosaurus rotfeldensis SMNS 50691	⁓0.49 (1)	?	0	⁓0.27 (2)	-	?	?	?	?	?	?	?	-	-	?	?	?	?	?	-	-	-	?	-	-	>26 (1)	-	-	?	?	?	?	?	?	?	?	-	-	0	?	?	-	n/a	?	?	?	?	?	?
Amotosaurus rotfeldensisSMNS 90601	-	?	-	-	-	?	?	?	?	?	?	?	-	-	?	?	?	?	?	-	-	-	?	0	-	-	0	n/a	?	?	?	?	?	?	?	?	0	0	0	?	?	1	n/a	?	?	?	?	?	?
Amotosaurus rotfeldensisSMNS 90600	-	?	-	-	-	?	?	?	?	?	?	?	-	-	?	?	?	?	?	-	-	-	?	-	-	-	-	-	?	?	?	?	?	?	?	?	-	-	-	?	?	-	n/a	?	?	?	?	?	?
Amotosaurus rotfeldensis SMNS unnumbered	-	?	-	-	0	?	?	?	?	?	?	?	4 to 6 (1/2)	0	?	?	?	?	?	-	-	-	?	-	-	-	-	-	?	?	?	?	?	?	?	?	-	-	-	?	?	-	n/a	?	?	?	?	?	?
Amotosaurus rotfeldensis total	1	?	0	2	0	?	?	?	?	?	?	?	1/2	0	?	?	?	?	?	1	2	0	?	0	1	1	0	-	?	?	?	?	?	?	?	?	0	0	0	?	?	1	-	?	?	?	?	?	?
AMNH FARB 7206	?	?	?	?	?	?	?	?	?	?	?	?	?	?	?	?	?	?	?	?	?	?	?	0	0	?	?	?	?	?	?	?	?	?	?	?	?	0	?	?	?	?	?	?	?	?	?	?	?
AMNH FARB 7206 total	?	?	?	?	?	?	?	?	?	?	?	?	?	?	?	?	?	?	?	?	?	?	?	0	0	?	?	?	?	?	?	?	?	?	?	?	?	0	?	?	?	?	?	?	?	?	?	?	?
Tanytrachelos ahynis VMNH 120346a	-	-	?	?	-	?	?	?	?	?	?	?	?	-	?	?	?	?	?	-	-	-	-	-	1	-	-	-	?	?	?	?	?	0	?	?	-	-	-	?	?	-	?	?	0	?	-	?	?
Tanytrachelos ahynis YPM 7496a	-	-	?	?	-	?	?	?	?	?	?	?	?	-	?	?	?	?	?	-	-	-	-	-	-	-	-	-	?	?	?	?	?	-	?	?	-	-	-	?	?	-	?	?	-	?	-	?	?
Tanytrachelos ahynis YPM 7482a	-	⁓0.27 (0)	?	?	-	?	?	?	?	?	?	?	?	-	?	?	?	?	?	-	-	-	-	0	1	>20 (1)	0	n/a	?	?	?	?	?	0	?	?	0	0	0	?	?	0	?	?	-	?	0	?	?
Tanytrachelos ahynis VMNH 982	0.44 (1)	-	?	?	-	?	?	?	?	?	?	?	?	-	?	?	?	?	?	1	2	0	0	-	-	-	-	-	?	?	?	?	?	-	?	?	-	0	0	?	?	-	?	?	-	?	-	?	?
Tanytrachelos ahynis NMS G.2017.11.1	-	-	?	?	0	?	?	?	?	?	?	?	?	0	?	?	?	?	?	-	-	-	-	-	-	-	-	-	?	?	?	?	?	-	?	?	-	-	-	?	?	-	?	?	0	?	-	?	?
Tanytrachelos ahynis YPM 7621ab	-	-	?	?	-	?	?	?	?	?	?	?	?	-	?	?	?	?	?	-	-	-	-	-	-	-	-	-	?	?	?	?	?	-	?	?	-	-	-	?	?	-	?	?	-	?	-	?	?
Tanytrachelos ahynis VMNH 120013	-	-	?	?	-	?	?	?	?	?	?	?	?	-	?	?	?	?	?	-	-	-	-	-	-	-	-	-	?	?	?	?	?	-	?	?	-	-	-	?	?	-	?	?	-	?	-	?	?
Tanytrachelos ahynis (Olsen 1979)	-	-	?	?	-	?	?	?	?	?	?	?	?	-	?	?	?	?	?	-	-	-	-	-	-	-	-	-	?	?	?	?	?	-	?	?	-	-	-	?	?	-	?	?	-	?	-	?	?
Reference in literature source
Tanytrachelos ahynis total	1	0	?	?	0	?	?	?	?	?	?	?	?	0	?	?	?	?	?	1	2	0	0	0	1	1	0	-	?	?	?	?	?	0	?	?	0	0	0	?	?	0	?	?	0	?	0	?	?
Elessaurus gondwanoccidens (UFSM 11471 from De Oliveira et al. 2020)	?	?	?	?	?	?	?	?	?	?	?	?	?	?	?	?	?	?	?	?	?	?	?	?	?	?	?	?	?	?	?	?	?	?	?	?	?	?	?	?	?	?	?	?	?	?	?	?	?
Elessaurus gondwanoccidens total	?	?	?	?	?	?	?	?	?	?	?	?	?	?	?	?	?	?	?	?	?	?	?	?	?	?	?	?	?	?	?	?	?	?	?	?	?	?	?	?	?	?	?	?	?	?	?	?	?
Ozimek volans (Dzik and Sulej 2016)	?	?	?	?	?	?	?	?	?	?	?	?	?	?	?	?	?	?	?	1	?	0	?	0	1 or 4	?	?	?	?	?	?	?	?	?	?	?	?	?	?	?	?	?	?	?	?	?	?	?	?
Reference in literature source																				ZPAL AbIII/3191		ZPAL AbIII/3191		ZPAL AbIII/3191	ZPAL AbIII/3191
Ozimek volans total	?	?	?	?	?	?	?	?	?	?	?	?	?	?	?	?	?	?	?	1	?	0	?	0	1/4	?	?	?	?	?	?	?	?	?	?	?	?	?	?	?	?	?	?	?	?	?	?	?	?
Pectodens zhenyuensis IVPP V18578	0.44 (1)	0.47 (1)	?	0.38 (2)	?	0	1	1	?	?	0	0	>10 (0)	?	?	?	?	?	?	?	?	0	0	0	0	>22 (1)	?	?	0	?	1	?	0	?	?	?	0	0	n/a	0	?	1	n/a	0	0	0	0	0	?
Pectodens zhenyuensis total	1	1	?	2	?	0	1	1	?	?	0	0	0	?	?	?	?	?	?	?	?	0	0	0	0	1	?	?	0	?	1	?	0	?	?	?	0	0	-	0	?	1	-	0	0	0	0	0	?
Fuyuansaurus acutirostris IVPP V17983	?	?	?	?	?	?	?	?	?	?	?	?	?	?	?	?	?	?	?	?	?	?	?	?	?	>25 (1)	0	n/a	?	?	?	?	?	?	?	?	?	?	0	0	?	?	?	0	?	?	?	1	?
Fuyuansaurus acutirostris total	?	?	?	?	?	?	?	?	?	?	?	?	?	?	?	?	?	?	?	?	?	?	?	?	?	1	0	-	?	?	?	?	?	?	?	?	?	?	0	0	?	?	?	0	?	?	?	1	?
Dinocephalosaurus orientalis IVPP V13767	0.58 (1)	?	0	0.31 (2)	0	1	2	1	1	1	?	0	>5 and <10 (0 or 1)	1	0	1	?	?	1	1	0	0	1	0	4	>12 (0)	0	n/a	0	1	1	n/a	1	?	2	?	0	0	n/a	0	n/a	1	n/a	0	?	0	0	0	0
Dinocephalosaurus orientalis (IVPP V13898 from Rieppel et al. 2008)	-	?	-	-	-	-	-	-	-	-	?	-	-	-	-	-	?	?	-	-	-	-	-	-	-	>15 (0)	-	-	-	-	-	-	-	?	-	?	-	-	-	-	-	-	-	-	?	-	-	-	-
Dinocephalosaurus orientalis total	1	?	0	2	0	1	2	1	1	1	?	0	0/1	1	0	1	?	?	1	1	0	0	1	0	4	0	0	-	0	1	1	-	1	?	2	?	0	0	-	0	-	1	-	0	?	0	0	0	0
Prolacerta broomi BP/1/471	0.46 (1)	0.48 (1)	0	0.15 (1)	1	-	-	-	2	1	-	0	-	0	1	n/a	0	-	1	-	0	0	0	0	1	-	0	n/a	-	-	0	-	0	-	1	0	0	0	0	0	0	-	-	0	0	0	0	0	1
Prolacerta broomi BP/1/5066	-	-	-	-	-	-	-	-	-	-	-	-	-	-	-	-	-	-	-	-	-	-	-	-	-	-	-	-	-	-	-	-	-	-	-	-	-	-	-	-	-	-	-	-	-	-	-	-	-
Prolacerta broomi BP/1/2676 (following Gow for proportions of digit IV and tibia/fibula)	-	-	-	-	-	-	-	-	-	-	-	-	-	-	-	-	-	-	-	-	-	-	-	-	-	-	-	-	-	-	-	-	-	-	-	-	-	-	-	-	-	-	-	-	-	-	-	-	-
Prolacerta broomi BP/1/5880	-	-	-	0.20 (1)	1	-	-	-	2	1	-	0	5 (1)	-	-	-	0	-	1	1	0	0	0	0	1	-	0	n/a	0	1	0	-	0	-	1	0	0	-	-	1	0	-	-	0	0	0	0	0	1
Prolacerta broomi BP/1/ 5375	-	-	-	-	-	-	-	-	-	-	-	-	-	-	-	-	-	-	-	1	-	0	-	-	-	-	-	-	-	-	-	-	-	-	-	-	-	0	0	-	-	-	-	-	-	-	-	-	-
Prolacerta broomi BP/1/2675 (following Gow for vomer)	-	-	-	-	-	-	-	-	-	-	-	-	-	-	-	-	-	-	-	-	-	-	-	-	-	-	-	-	-	-	-	-	-	-	-	-	-	-	-	-	-	-	-	-	-	-	-	-	-
Prolacerta broomi BP/1/ 4504a	-	-	-	-	-	-	-	-	-	-	-	-	-	-	-	-	-	-	-	-	-	-	-	-	-	-	-	-	-	-	-	-	-	-	-	-	-	-	-	-	-	-	-	-	-	-	-	-	-
Prolacerta broomi SAM-PK-K10802	-	-	-	-	-	-	-	-	-	-	-	-	-	-	-	-	-	-	-	-	-	-	-	-	-	-	-	-	-	-	-	-	-	-	-	-	-	-	-	-	-	-	-	-	-	-	-	-	-
Prolacerta broomi UCMP 37151 (includes also scan data)	0.45 (1)	-	-	0.13 (1)	1	0	2	0	-	1	1	0	-	0	-	-	0	0	1	1	0	0	0	0	1	-	0	n/a	-	-	0	n/a	-	0	1	0	0	0	0	1	0	0	-	0	0	0	-	0	1
Prolacerta broomi UWBM 95529	-	-	-	-	-	-	-	-	-	-	-	-	-	-	-	-	-	-	-	-	-	-	-	-	-	-	-	-	-	-	-	-	-	-	-	-	-	-	-	-	-	-	-	-	-	-	-	-	-
Prolacerta broomi AMNH FARB 9520	0.43 (1)	⁓0.43 (1)	-	0.27 (2)	1	-	-	0	-	-	-	-	-	-	-	-	-	-	-	-	-	-	0	-	1	>14 (1)	-	-	-	-	0	-	0	-	-	0	-	-	-	-	0	-	-	0	-	-	0	-	-
Prolacerta broomi AMNH FARB 9521	-	-	-	-	-	-	-	-	-	-	-	-	-	-	-	-	-	-	1	-	-	-	-	0	1	>14 (1)	0	n/a	-	-	-	-	-	-	-	-	0	0	0	0	-	0	⁓1.60 (0)	-	0	-	-	-	-
Prolacerta broomi AMNH FARB 9502	-	-	-	-	-	0	-	-	2	1	-	0	-	-	-	-	0	-	-	-	-	-	-	-	-	-	-	-	-	-	-	-	-	-	-	-	-	-	-	-	-	-	-	-	-	-	-	-	-
Prolacerta broomi AMNH FARB 9568	-	-	-	-	-	-	-	-	-	-	-	-	-	-	-	-	-	-	-	-	-	-	-	-	-	-	-	-	-	-	-	-	-	-	-	-	-	-	-	-	-	-	-	-	-	-	-	-	-
Prolacerta broomi AMNH FARB 9558	-	-	-	-	-	-	-	-	-	-	-	-	-	-	-	-	-	-	-	-	-	-	-	-	-	-	-	-	-	-	-	-	-	-	-	-	-	-	-	-	-	-	-	-	-	-	-	-	-
Prolacerta broomi AMNH FARB 9560	-	-	-	-	-	-	-	-	-	-	-	-	-	-	-	-	-	-	-	-	-	-	-	-	-	-	-	-	-	-	-	-	-	-	-	-	-	-	-	-	-	-	-	-	-	-	-	-	-
Prolacerta broomi AMNH FARB 9551	-	-	-	-	-	-	-	-	-	-	-	-	-	-	-	-	-	-	-	-	-	-	-	-	-	-	-	-	-	-	-	-	-	-	-	-	-	-	-	-	-	-	-	-	-	-	-	-	-
Prolacerta broomi AMNH FARB 9573	-	-	-	-	-	-	-	-	-	-	-	-	-	-	-	-	-	-	-	-	-	-	-	-	-	-	-	-	-	-	-	-	-	-	-	-	-	-	-	-	-	-	-	-	-	-	-	-	-
Prolacerta broomi AMNH FARB 9526	-	-	-	-	-	-	-	-	-	-	-	-	-	-	-	-	-	-	-	-	-	-	-	-	-	-	-	-	-	-	-	-	-	-	-	-	-	-	-	-	-	-	-	-	-	-	-	-	-
Prolacerta broomi AMNH FARB 9557	-	-	-	-	-	-	-	-	-	-	-	-	-	-	-	-	-	-	-	-	-	-	-	-	-	-	-	-	-	-	-	-	-	-	-	-	-	-	-	-	-	-	-	-	-	-	-	-	-
Prolacerta broomi AMNH FARB 9574	-	-	-	-	-	-	-	-	-	-	-	-	-	-	-	-	-	-	-	-	-	-	-	-	-	-	-	-	-	-	-	-	-	-	-	-	-	-	-	-	-	-	-	-	-	-	-	-	-
Prolacerta broomi AMNH FARB 9564	-	-	-	-	-	-	-	-	-	-	-	-	-	-	-	-	-	-	-	-	-	-	-	-	-	-	-	-	-	-	-	-	-	-	-	-	-	-	-	-	-	-	-	-	-	-	-	-	-
Prolacerta broomi total	1	1	0	1&2	1	0	2	0	2	1	1	0	1	0	1	-	0	0	1	1	0	0	0	0	1	1	0	-	0	1	0	-	0	0	1	0	0	0	0	0&1	0	0	0	0	0	0	0	0	1
Pamelaria dolichotrachela ISIR 316/1	⁓0.37 (0)	?	?	?	?	?	-	-	?	?	?	?	-	-	?	?	?	?	?	1	?	0	?	0	2	-	0	n/a	-	?	-	?	?	0	2	?	0	0	0	0	?	0	?	?	0	1	0	1	0
Pamelaria dolichotrachela ISIR 318/4	-	?	?	?	?	?	-	-	?	?	?	?	-	-	?	?	?	?	?	-	?	-	?	-	-	-	-	-	-	?	-	?	?	-	-	?	-	-	-	-	?	-	?	?	-	-	-	-	-
Pamelaria dolichotrachela ISIR 333/1	-	?	?	?	?	?	-	-	?	?	?	?	-	-	?	?	?	?	?	-	?	-	?	-	-	-	-	-	-	?	-	?	?	-	-	?	-	-	-	-	?	-	?	?	-	-	-	-	-
Pamelaria dolichotrachela unnumbered	-	?	?	?	?	?	-	-	?	?	?	?	-	-	?	?	?	?	?	-	?	-	?	-	-	-	-	-	-	?	-	?	?	-	-	?	-	-	-	-	?	-	?	?	-	-	-	-	-
Pamelaria dolichotrachela (Sen 2003)	-	?	?	?	?	?	0	n/a	?	?	?	?	4 (2)	0	?	?	?	?	?	-	?	-	?	-	-	⁓21 (1)	-	-	1	?	0	?	?	-	-	?	-	-	-	-	?	-	?	?	-	-	-	-	-
Reference in literature source							Reconstruction	Reconstruction					text	Reconstruction												text			text		text
Pamelaria dolichotrachela total	0	?	?	?	?	?	0	-	?	?	?	?	2	0	?	?	?	?	?	1	?	0	?	0	2	1	0	-	1	?	0	?	?	0	2	?	0	0	0	0	?	0	?	?	0	1	0	1	0
Azendohsaurus madagaskarensis FMNH PR 2794	-	-	-	-	-	-	-	-	-	-	-	-	-	-	-	-	-	?	-	-	-	-	-	-	-	-	-	-	-	-	-	-	-	-	-	-	-	-	-	-	-	-	-	-	-	-	-	-	-
Azendohsaurus madagaskarensis FMNH PR 2789	-	-	-	-	-	-	-	-	-	-	-	-	-	-	-	-	-	?	-	-	-	-	-	-	-	-	-	-	-	-	-	-	-	-	-	-	-	-	-	-	-	-	-	-	-	-	-	-	-
Azendohsaurus madagaskarensis FMNH PR 2755	-	-	-	-	-	-	-	-	-	-	-	-	-	-	-	-	-	?	-	-	-	-	-	-	-	-	-	-	-	-	-	-	-	-	-	-	-	-	-	-	-	-	-	-	-	-	-	-	-
Azendohsaurus madagaskarensis FMNH PR 2771	-	-	-	-	-	-	-	-	-	-	-	-	-	-	-	-	-	?	-	-	-	-	-	-	-	-	-	-	-	-	-	-	-	-	-	-	-	-	-	-	-	-	-	-	-	-	-	-	-
Azendohsaurus madagaskarensis FMNH PR 2777	-	-	-	-	-	-	-	-	-	-	-	-	-	-	-	-	-	?	-	-	-	-	-	-	-	-	-	-	-	-	-	-	-	-	-	-	-	-	-	-	-	-	-	-	-	-	-	-	-
Azendohsaurus madagaskarensis FMNH PR 2775	-	-	-	-	-	-	-	-	-	-	-	-	-	-	-	-	-	?	-	-	-	-	-	-	-	-	-	-	-	-	-	-	-	-	-	-	-	-	-	-	-	-	-	-	-	-	-	-	-
Azendohsaurus madagaskarensis FMNH PR 2773	-	-	-	-	-	-	-	-	-	-	-	-	-	-	-	-	-	?	-	-	-	-	-	-	-	-	-	-	-	-	-	-	-	-	-	-	-	-	-	-	-	-	-	-	-	-	-	-	-
Azendohsaurus madagaskarensis FMNH PR 2781	-	-	-	-	-	-	-	-	-	-	-	-	-	-	-	-	-	?	-	-	-	-	-	-	-	-	-	-	-	-	-	-	-	-	-	-	-	-	-	-	-	-	-	-	-	-	-	-	-
Azendohsaurus madagaskarensis FMNH PR 2793	-	-	-	-	-	-	-	-	-	-	-	-	-	-	-	-	-	?	-	-	-	-	-	-	-	-	-	-	-	-	-	-	-	-	-	-	-	-	-	-	-	-	-	-	-	-	-	-	-
Azendohsaurus madagaskarensis FMNH PR 3813	-	-	-	-	-	-	-	-	-	-	-	-	-	-	-	-	-	?	-	-	-	-	-	-	-	-	-	-	-	-	-	-	-	-	-	-	-	-	-	-	-	-	-	-	-	-	-	-	-
Azendohsaurus madagaskarensis FMNH PR 2779	-	-	-	-	-	-	-	-	-	-	-	-	-	-	-	-	-	?	-	-	-	-	-	-	-	-	-	-	-	-	-	-	-	-	-	-	-	-	-	-	-	-	-	-	-	-	-	-	-
Azendohsaurus madagaskarensis FMNH PR 2788	-	-	-	-	-	-	-	-	-	-	-	-	-	-	-	-	-	?	-	-	-	-	-	-	-	-	-	-	-	-	-	-	-	-	-	-	-	-	-	-	-	-	-	-	-	-	-	-	-
Azendohsaurus madagaskarensis FMNH PR 3818	-	-	-	-	-	-	-	-	-	-	-	-	-	-	-	-	-	?	-	-	-	-	-	-	-	-	-	-	-	-	-	-	-	-	-	-	-	-	-	-	-	-	-	-	-	-	-	-	-
Azendohsaurus madagaskarensis FMNH PR 3823	-	-	-	-	-	-	-	-	-	-	-	-	-	-	-	-	-	?	-	-	-	-	-	-	-	-	-	-	-	-	-	-	-	-	-	-	-	-	-	-	-	-	-	-	-	-	-	-	-
Azendohsaurus madagaskarensis UA 7-20-99-653	-	-	-	-	-	-	-	-	-	-	-	-	-	-	-	-	-	?	-	-	-	-	-	-	-	-	-	-	-	-	-	-	-	-	-	-	-	-	-	-	-	-	-	-	-	-	-	-	-
Azendohsaurus madagaskarensis FMNH PR 2791	-	-	-	-	-	-	-	-	-	-	-	-	-	-	-	-	-	?	-	-	-	-	-	-	-	-	-	-	-	-	-	-	-	-	-	-	-	-	-	-	-	-	-	-	-	-	-	-	-
Azendohsaurus madagaskarensis FMNH PR 2776	-	-	-	-	-	-	-	-	-	-	-	-	-	-	-	-	-	?	-	-	-	-	-	-	-	-	-	-	-	-	-	-	-	-	-	-	-	-	-	-	-	-	-	-	-	-	-	-	-
Azendohsaurus madagaskarensis FMNH PR 2765	-	-	-	-	-	-	-	-	-	-	-	-	-	-	-	-	-	?	-	-	-	-	-	-	-	-	-	-	-	-	-	-	-	-	-	-	-	-	-	-	-	-	-	-	-	-	-	-	-
Azendohsaurus madagaskarensis (Flynn et al. 2011)	0.48 (1)	0.62 (2)	0	0.29 (2)	0	0	n/a	n/a	2	0	0	0	4 (2)	0	0	0	2	?	1	1	2	0	0	1	0	12 to 14 (0)	0	n/a	1	n/a	0	0	0	0	1	n/a	0	0	0	0	1	0	1.81 (0)	0	0	1	0	1	1
Azendohsaurus madagaskarensis (Ezcurra 2016)	-	-	-	-	-	-	-	-	-	-	-	-	-	-	-	-	-	?	-	-	-	-	-	-	-	-	-	-	-	-	-	-	-	-	-	-	-	-	-	-	-	-	-	-	-	-	-	-	-
Azendohsaurus madagaskarensis (Nesbitt et al. 2015)	-	-	-	-	-	-	-	-	-	-	-	-	-	-	-	-	-	?	-	-	-	-	-	-	-	-	-	-	-	-	-	-	-	-	-	-	-	-	-	-	-	-	-	-	-	-	-	-	-
Reference in literature source	Reconstruction	Reconstruction	UA-7-20-99-653	Reconstruction	FMNH PR 2751 and text	FMNH PR 2751	FMNH PR 2751	FMNH PR 2751	FMNH PR 2751 and reconstruction	FMNH PR 2751	FMNH PR 2751	FMNH PR 2751	FMNH PR 2751 and text	FMNH PR 2751	text	FMNH PR 2751	FMNH PR 2751		FMNH PR 2751	FMNH PR 2751	FMNH PR 2751	FMNH PR 2751	FMNH PR 2751	UA-7-20-99-653, FMNH PR 2751, and text	FMNH PR 2751	text	FMNH PR 2751		FMNH PR 2751	Reconstruction	FMNH PR 2751	text and FMNH PR 2751	text and FMNH PR 2751	text and FMNH PR 2751	UA-7-20-99-653 and text		UA-7-20-99-653, FMNH PR 2751, and text	UA-7-20-99-653, FMNH PR 2751, and text	UA-7-20-99-653	FMNH PR 2751	UA-7-20-99-653	FMNH PR 2751	FMNH PR 2751	UA-7-20-99-653	UA-7-20-99-653	UA-7-20-99-653 and text	UA-7-20-99-653	UA-7-20-99-653	UA-7-20-99-653 and text
Azendohsaurus madagaskarensis total	1	2	0	2	0	0	-	-	2	0	0	0	2	0	0	0	2	?	1	1	2	0	0	1	0	0	0	-	1	-	0	0	0	0	1	-	0	0	0	0	1	0	0	0	0	1	0	1	1
Trilophosaurus buettneri (Spielmann et al. 2008)	0.40 (0)	0.78 (2)	1	0.54 (3)	0	0	1	0	2	0	1	0	5 (edentulous)	0	0	1	0	-	1	0	0	0	0	1	0	⁓13 (0)	1	0	0	1	0	n/a	0	?	?	?	1	0	n/a	0	n/a	1	n/a	0	1	1	0	0	?
Trilophosaurus buettneri (Gregory 1945)	-	-	-	-	-	-	-	-	-	-	-	-	-	-	-	-	-	0	-	-	-	-	-	-	-	⁓13 (0)	-	-	-	-	-	-	-	?	?	?	-	-	-	-	-	-	-	-	-	-	-	-	?
Trilophosaurus buettneri (Nesbitt et al. 2015)	-	-	-	-	-	-	-	-	-	-	-	-	-	-	-	-	-	-	-	-	-	-	-	-	-	-	-	-	-	-	-	-	-	?	?	?	-	-	-	-	-	-	-	-	-	1	-	-	?
Trilophosaurus buettneri (Flynn et al. 2010)	-	-	-	-	-	-	-	-	-	-	-	-	-	-	-	-	-	-	-	-	-	-	-	-	-	-	-	-	-	-	-	-	-	?	?	?	-	-	-	-	-	-	-	-	-	-	-	-	?
Reference in literature source	Reconstruction	TMM 31025-207	Reconstruction	TMM 31025-207	TMM 31025-207	TMM 31025-207	TMM 31025-207	TMM 31025-207	TMM 31025-207	TMM 31025-207	TMM 31025-207 and reconstruction	TMM 31025-207	TMM 31025-207	TMM 31025-143	TMM 31025-207	TMM 31025-207	TMM 31025-207	text	TMM 31025-207	TMM 31025-207	TMM 31025-207	TMM 31025-207 and TMM 31025-143	TMM 31025-140, TMM 31025-207, and TMM 31025-143	TMM 31025-140	TMM 31025-140, TMM 31025-207, and TMM 31025-143	TMM 31025-140 and text of Gregory, 1945	TMM 31025-143	TMM 31025-143	TMM 31025-207	TMM 31025-207	TMM 31025-207	TMM 31025-207	TMM 31025-207				TMM 31025-143	TMM 31025-140 and text	TMM 31025-140	TMM 31025-143	TMM 31025-140	TMM 31025-140	TMM 31025-140	TMM 31025-140	TMM 31025-207 and reconstruction	TMM 31025-207 and text of Nesbitt et al., 2015	TMM 31025-207	TMM 31025-140
Trilophosaurus buettneri total	0	2	1	3	0	0	1	0	2	0	1	0	5	0	0	1	0	0	1	0	0	0	0	1	0	0	1	0	0	1	0	-	0	?	?	?	1	0	-	0	-	1	-	0	1	1	0	0	?
Mesosuchus browni SAM-PK-6536	0.32 (0)	0.46 (1)	0	⁓0.29 (2)	1	?	n/a	n/a	3	0	?	0	-	0	1	1	1	0	0	1	0	0	0	0	0	n/a	0	n/a	1	1	0	1	0	1	n/a	1	0	0	0	1	0	0	3.64 (1)	1	0	0	0	1	1
Mesosuchus browni SAM-PK-6536 (extrapolated from data of Sobral and Müller 2019)	-	-	-	-	-	?	-	-	-	-	?	-	-	-	-	-	-	-	-	-	-	-	-	-	-	-	-	-	-	-	-	-	-	-	-	-	-	-	-	-	-	-	-	-	-	-	-	-	-
Mesosuchus browni SAM-PK-5882	-	-	-	-	-	?	-	-	-	-	?	-	2 (4)	-	-	-	-	-	-	-	-	-	-	-	-	-	-	-	-	-	-	-	-	-	-	-	-	-	-	-	-	-	-	-	-	-	-	-	-
Mesosuchus browni SAM-PK-6046	-	-	-	-	-	?	-	-	-	-	?	-	-	-	-	-	-	-	-	-	-	-	-	-	-	-	-	-	-	-	-	-	-	-	-	-	-	-	-	-	-	-	-	-	-	-	-	-	-
Mesosuchus browni SAM-PK-7416	-	-	-	-	-	?	-	-	-	-	?	-	-	-	-	-	-	-	-	-	-	-	-	-	-	-	-	-	-	-	-	-	-	-	-	-	-	-	-	-	-	-	-	-	-	-	-	-	-
Mesosuchus browni total	0	1	0	2	1	?	-	-	3	0	?	0	4	0	1	1	1	0	0	1	0	0	0	0	0	-	0	-	1	1	0	1	0	1	-	1	0	0	0	1	0	0	1	1	0	0	0	1	1
Howesia browni SAM-PK-5884	?	?	?	?	?	?	?	?	?	?	?	?	?	?	?	?	?	?	?	1	?	?	n/a	0	2	n/a	1	0	?	?	?	1	0	1	2	?	0	0	0	0	-	?	?	1	0	0	0	1	0
Howesia browni SAM-PK-5885	?	?	?	?	?	?	?	?	?	?	?	?	?	?	?	?	?	?	?	-	?	?	-	-	-	-	-	-	?	?	?	-	-	-	-	?	-	-	-	-	-	?	?	-	-	-	-	-	-
Howesia browni SAM-PK-5886	?	?	?	?	?	?	?	?	?	?	?	?	?	?	?	?	?	?	?	-	?	?	-	-	-	-	-	-	?	?	?	-	-	-	-	?	-	-	-	-	-	?	?	-	-	-	-	-	-
Howesia browni SAM-PK-5885 (extrapolated from Dilkes 1995 since the dorsal side of the specimen, which is covered in gypsum currently, was described therein)	?	?	?	?	?	?	?	?	?	?	?	?	?	?	?	?	?	?	?	-	?	?	-	-	-	-	-	-	?	?	?	-	-	-	-	?	-	-	-	-	0	?	?	-	-	-	-	-	-
Howesia browni total	?	?	?	?	?	?	?	?	?	?	?	?	?	?	?	?	?	?	?	1	?	?	-	0	2	-	1	0	?	?	?	1	0	1	2	?	0	0	0	0	0	?	?	1	0	0	0	1	0
Eohyosaurus wolvaardti SAM-PK-K10159	?	?	?	?	?	?	?	?	?	?	?	?	?	?	?	?	?	?	?	?	?	?	?	0	2	n/a	1	0	?	?	?	?	?	?	?	?	0	0	0	1	1	0	3.09 (1)	?	?	?	0	1	?
Eohyosaurus wolvaardti (extrapolated from data of Butler et al. 2015)	?	?	?	?	?	?	?	?	?	?	?	?	?	?	?	?	?	?	?	?	?	?	?	-	-	-	-	-	?	?	?	?	?	?	?	?	-	-	-	-	-	-	-	?	?	?	-	-	?
Eohyosaurus wolvaardti (extrapolated from data of Sobral and Müller 2019)	?	?	?	?	?	?	?	?	?	?	?	?	?	?	?	?	?	?	?	?	?	?	?	-	-	-	-	-	?	?	?	?	?	?	?	?	-	-	-	-	-	-	-	?	?	?	-	-	?
Eohyosaurus wolvaardti total	?	?	?	?	?	?	?	?	?	?	?	?	?	?	?	?	?	?	?	?	?	?	?	0	2	-	1	0	?	?	?	?	?	?	?	?	0	0	0	1	1	0	1	?	?	?	0	1	?
Teyujagua paradoxa UNIPAMPA 653	0.43 (1)	0.41 (1)	0	0.20 (1)	1	0	n/a	n/a	1	1	-	0	4 (2)	0	1	-	-	-	0	1	0	0	0	0	0	-	0	n/a	1	n/a	0	1	0	-	2	-	0	0	1	1	0	0	2.85 (1)	0	0	1	0	1	0
Teyujagua paradoxa (extrapolated from data of Pinheiro et al. 2019)	-	-	-	-	-	-	-	-	-	-	1	-	-	-	-	n/a	0	1	-	-	-	-	-	-	-	16 (0)	-	-	-	-	-	-	-	0	-	0	-	-	-	-	-	-	-	-	-	-	-	-	-
Teyujagua paradoxa total	1	1	0	1	1	0	-	-	1	1	1	0	2	0	1	-	0	1	0	1	0	0	0	0	0	0	0	-	1	-	0	1	0	0	2	0	0	0	1	1	0	0	1	0	0	1	0	1	0
Proterosuchus fergusi SAM-PK-11208	0.51 (1)	0.36 (1)	1	0.29 (2)	2	0	-	-	2	0	-	0	8 (0)	0	1	n/a	0	-	1	1	-	1	n/a	0	2	25 (1)	0	n/a	-	1	0	-	-	-	1	-	0	0	1	-	0	0	5.84 (3)	-	-	0	1	1	-
Proterosuchus fergusi SAM-PK-K10603	-	-	1	-	-	-	-	-	-	-	-	-	-	-	-	-	-	-	-	-	-	-	-	-	-	-	-	-	-	-	-	-	-	n/a	-	0	-	-	-	0	-	-	-	0	0	-	-	-	0
Proterosuchus fergusi BP/1/3993	-	-	-	-	-	-	-	-	-	-	-	-	-	-	-	-	-	-	-	-	-	-	-	-	-	-	-	-	-	-	-	-	-	-	-	-	-	-	-	-	-	-	-	-	-	-	-	-	-
Proterosuchus fergusi (Ezcurra and Butler 2015a)	-	-	-	-	-	-	2	-	-	-	1	-	-	-	-	-	-	0	-	-	1	-	-	-	-	-	-	-	-	-	-	-	-	-	-	-	0	-	-	-	0	-	-	-	-	-	-	-	-
Proterosuchus fergusi (Ezcurra and Butler 2015b)	-	-	-	-	-	-	-	1	-	-	-	-	-	-	-	-	-	-	-	-	-	-	-	-	-	-	-	-	0	-	-	n/a	0	-	-	-	-	-	-	-	-	-	-	-	-	-	-	-	-
Proterosuchus fergusi (Cruickshank, 1972)	-	-	-	-	-	-	-	-	-	-	-	-	-	-	-	-	-	-	-	-	-	-	-	-	-	-	-	-	-	-	-	-	-	-	-	-	-	-	-	-	-	-	-	-	-	-	-	-	-
Proterosuchus fergusi (Gow, 1975)	-	-	-	-	-	-	-	-	-	-	-	-	-	-	-	-	-	-	-	-	-	-	-	-	-	-	-	-	-	-	-	-	-	-	-	-	-	-	-	-	-	-	-	-	-	-	-	-	-
Reference in literature source							Various reconstructions	RC 59			BP/1/4016							SAM-PK-591 and text			RC 846								RC 59			RC 59	RC 59				RC 846				RC 846
Proterosuchus fergusi total	1	1	1	2	2	0	2	1	2	0	1	0	0	0	1	-	0	0	1	1	1	1	-	0	2	1	0	-	0	1	0	-	0	-	1	0	0	0	1	0	0	0	3	0	0	0	1	1	0
Proterosuchus alexanderi NM QR 1484	0.50 (1)	0.25 (0)	1	?	2	-	?	?	2	0	1	0	?	0	1	n/a	?	?	?	1	?	1	n/a	0	2	>20 (1)	0	n/a	?	?	?	?	?	n/a	1	?	0	0	1	0	0	0	5.29 (3)	0	0	0	1	1	0
Proterosuchus alexanderi total	1	0	1	?	2	-	?	?	2	0	1	0	?	0	1	-	?	?	?	1	?	1	-	0	2	1	0	-	?	?	?	?	?	-	1	?	0	0	1	0	0	0	3	0	0	0	1	1	0
Euparkeria capensis SAM-PK-5867	0.46 (1)	0.71 (2)	1	-	0	-	-	-	2	0	-	0	-	-	0	0	-	?	1	1	2	1	n/a	0	2	-	0	n/a	-	-	0	-	0	n/a	1	n/a	0	1	0	1	0	0	4.61 (2)	0	0	0	0	0	1
Euparkeria capensis SAM-PK-13664	-	-	-	-	-	-	-	-	-	-	-	-	-	-	-	-	-	?	-	-	-	-	-	-	-	-	-	-	-	-	-	-	-	-	-	-	-	-	-	-	-	-	-	-	-	-	-	-	-
Euparkeria capensis SAM-PK-6047A	-	-	-	-	-	-	-	-	-	-	-	-	-	-	-	-	0	?	-	-	-	-	-	-	-	-	-	-	-	-	-	-	-	-	-	-	-	-	-	-	-	-	-	-	-	-	-	-	-
Euparkeria capensis SAM-PK-6047B	-	-	-	-	-	-	-	-	-	-	-	-	-	-	-	-	-	?	-	-	-	-	-	-	-	-	-	-	-	-	-	-	-	-	-	-	-	-	-	-	-	-	-	-	-	-	-	-	-
Euparkeria capensis SAM-PK-8309	-	-	-	-	-	-	-	-	-	-	-	-	-	-	-	-	-	?	-	-	-	-	-	-	-	-	-	-	-	-	-	-	-	-	-	-	-	-	-	-	-	-	-	-	-	-	-	-	-
Euparkeria capensis SAM-PK-6049	-	-	-	-	-	-	-	-	-	-	-	-	-	-	-	-	-	?	-	-	-	-	-	-	-	-	-	-	-	-	-	-	-	-	-	-	-	-	-	-	-	-	-	-	-	-	-	-	-
Euparkeria capensis (Ewer 1965)	-	-	-	⁓0.17 (1)	-	1	2	0	-	-	1	-	2 (4)	0	-	-	-	?	-	-	-	-	-	-	-	12 (0)	-	-	0	0	-	n/a	-	-	-	-	-	-	-	-	-	-	-	-	-	-	-	-	-
Euparkeria capensis (Sookias 2016)	-	-	-	-	-	-	-	-	-	-	-	-	-	-	-	-	-	?	-	-	-	-	-	-	-	-	-	-	-	-	-	-	-	-	-	-	-	-	-	-	-	-	-	-	-	-	-	-	-
Euparkeria capensis (Sobral et al. 2016)	-	-	-	-	-	-	-	-	-	-	-	-	-	-	-	-	-	?	-	-	-	-	-	-	-	-	-	-	-	-	-	-	-	-	-	-	-	-	-	-	-	-	-	-	-	-	-	-	-
Euparkeria capensis (Sobral 2014 PhD thesis)	-	-	-	-	-	-	-	-	-	-	-	-	-	-	-	-	-	?	-	-	-	-	-	-	-	-	-	-	-	-	-	-	-	-	-	-	-	-	-	-	-	-	-	-	-	-	-	-	-
Euparkeria capensis (Dilkes 1998)	-	-	-	-	-	-	-	-	-	-	-	-	-	-	-	-	-	?	-	-	-	-	-	-	-	-	-	-	-	-	-	-	-	-	-	-	-	-	-	-	-	-	-	-	-	-	-	-	-
Reference in literature source	-	-	-	Reconstruction	-	Reconstruction	Reconstruction	Reconstruction	-	-	Reconstruction	-	Reconstruction	Reconstruction	-	-	-	?	-	-	-	-	-	-	-	Reconstruction	-	-	Reconstruction	Reconstruction	-	Reconstruction	-	-	-	-	-	-	-	-	-	-	-	-	-	-	-	-	-
Euparkeria capensis total	1	2	1	1	0	1	2	0	2	0	1	0	2	0	0	0	0	?	1	1	2	1	-	0	2	0	0	-	0	0	0	-	0	-	1	-	0	1	0	1	0	0	2	0	0	0	0	0	1
Erythrosuchus africanus BP/1/5207	0.59 (1)	0.66 (2)	1	0.29 (2)	1	0	1	0	2	0	-	0	5 combined with BP/1/4526 (1)	0	0	-	-	?	0	1	2	1	n/a	0	4	11 (0)	0	n/a	0	1	0	n/a	0	n/a	-	?	0	1	1	0	0	0	3.35 (1)	0	0	0	1	1	-
Erythrosuchus africanus BP/1/4526	-	-	-	-	-	-	-	-	-	-	-	-	5 combined with BP/1/5207 (1)	-	-	-	2	?	-	-	-	-	-	-	-	-	-	-	-	-	-	-	-	-	-	?	-	-	-	-	-	-	-	-	-	-	-	-	-
Erythrosuchus africanus BP/1/3893	-	-	-	-	-	-	-	-	-	-	-	-	-	-	-	-	-	?	-	-	-	-	-	-	-	-	-	-	-	-	-	-	-	-	-	?	-	-	-	-	-	-	-	-	-	-	-	-	-
Erythrosuchus africanus BP/1/4680	-	-	-	-	-	-	-	-	-	-	-	-	-	-	-	-	-	?	-	-	-	-	-	-	-	-	-	-	-	-	-	-	-	-	-	?	-	-	-	-	-	-	-	-	-	-	-	-	-
Erythrosuchus africanus BP/1/2096	-	-	-	-	-	-	-	-	-	-	-	-	-	-	-	-	-	?	-	-	-	-	-	-	-	-	-	-	-	-	-	-	-	-	-	?	-	-	-	-	-	-	-	-	-	-	-	-	-
Erythrosuchus africanus (Gower 2003)	-	-	-	-	-	-	-	-	-	-	1	-	-	-	-	-	-	?	-	-	-	-	-	-	-	-	-	-	-	-	-	-	-	-	1	?	-	-	-	-	-	-	-	-	-	-	-	-	0
Erythrosuchus africanus (Gower 1996)	-	-	-	-	-	-	-	-	-	-	-	-	-	-	-	-	-	?	-	-	-	-	-	-	-	-	-	-	-	-	-	-	-	-	-	?	-	-	-	-	-	-	-	-	-	-	-	-	-
Erythrosuchus africanus (Nesbitt 2011)	-	-	-	-	-	-	-	-	-	-	-	-	-	-	-	1	-	?	-	-	-	-	-	-	-	-	-	-	-	-	-	-	-	-	-	?	-	-	-	-	-	-	-	-	-	-	-	-	-
Erythrosuchus africanus (Ezcurra 2016)	-	-	-	-	-	-	-	-	-	-	-	-	-	-	-	-	-	?	-	-	-	-	-	-	-	-	-	-	-	-	-	-	-	-	-	?	-	-	-	-	-	-	-	-	-	-	-	-	-
Reference in literature source											NHMUK PV R3592 (BMNH in Gower 2003)					comments of character 12																			Interpretative drawing of NMQR 1473														Interpretative drawing of NHMUK PV R3592 (BMNH in Gower 2003)
Erythrosuchus africanus total	1	2	1	2	1	0	1	0	2	0	1	0	1	0	0	1	2	?	0	1	2	1	-	0	4	0	0	-	0	1	0	-	0	-	1	?	0	1	1	0	0	0	1	0	0	0	1	1	0
5% of the range of the sampled ratio values for meristic characters	0.02	0.03		0.02																																							0.26
Specimens in green are likely not completely adult individuals based on their relative size and/or skeletal indications of immaturity
[truncated: 258 more columns]

## Sheet: Sheet2
Tanystropheus hydroides scoring
Tanystropheus hydroides specimen number(s) or literature
Tanystropheus longobardicus scoring
Tanystropheus longobardicus specimen number(s) or literature

## Sheet: Sheet3
?
?
?
?
0.46 (1)
0.59 (1)
?
0.48 (1)
0.45? Full length slightly guestimated (1, KUVP 9952)
0.46 (1)
?
0.35 (0) (skull reconstruction)
0.35 (0) (reconstruction)
0.4245 (0/1)
?
?
?
